# Supplementary material
Source: publisher figshare collection journal article supplement (https://gsajournals.figshare.com/ndownloader/files/16356629)
Supplement: Supplementary file 1 [file 16356629]

## Sheet: Sheet1
Table S2. Gene-locus interactions that are associated with mice weight loss following influenza infection
Gene		SNP						Criteria		Enriched functional annotations
Gene	Chr	Name	Position	GWAS score (-log P-value)	Relevant genes	Module	Fraction	I	II	IFNAR1 signling **	IFNG targets**	IRF7 targets**	STAT1 targets**	Additional antiviral role	Function of lymphocytes*	Function of leukocytes*	Systemic autoimmune syndrome**	rheumatoid arthritis*
Slfn2	11	JAX00695405	Chr 9: 58932046	1.917	Pkm2, Rpl11	M1	0.146067	+					+		+	+	+	+
Fbxw17	13	UNC16454169	Chr 9: 59954531	2.204			0.225806	+
Gm9844	7	UNC090111709	Chr 9: 58776520	1.94			0.22549	+
Arel1	12	UNC16442430	Chr 9: 58779972	1.94			0.163265		+
Tspan2	3	JAX00185476	Chr x: 140091264	1.156	Pak3, Capn6	M2	0.170213	+	+
Pnp2	14	UNC31417141	Chr x: 140326121	1.751			0.155963		+
Glipr2	4	UNC31417141	Chr x: 140326121	1.751			0.371134		+		+						+	+
C19orf12	7	UNC31498203	Chr x: 153625646	1.655			0.205882	+
Hn1	11	UNC31409692	Chr x: 139492921	1.383			0.37037		+
Gadd45b	10	UNC31412308	Chr x: 139805499	1.393			0.322034		+					PMID: 17891184	+	+	+	+
Gm12250	11	UNC31525307	Chr x: 157255861	1.985		M3	0.149533	+
Manf	9	UNC31499614	Chr x: 153778744	1.665			0.145631	+
Rassf3	10	UNC31501345	Chr x: 153943846	1.659			0.17	+
Gsdmd	15	UNC31514736	Chr x: 155929945	1.759			0.21		+		+
Mndal	1	JAX00621600	Chr 6: 108491072	1.924	Il5ra, Oxtr, Rad18	M4	0.168317	+
Irgm1	11	UNC060168022	Chr 6: 107659246	1.992			0.161017	+	+		+	+	+				+
Cmpk2	12	UNC060168022	Chr 6: 107659246	1.992			0.16092	+	+	+	+	+	+
Atf3	1	JAX00064201	Chr 15: 81359703	2.081	Rbx1, Ep300	M5	0.148515		+	+	+				+	+
Tgtp2	11	UNC25975972	Chr 15: 81532648	2.106			0.191011		+					PMID: 20545783
Ogfr	2	UNC25975972	Chr 15: 81532648	2.106			0.183486		+
Helz2	2	UNC25975972	Chr 15: 81532648	2.106			0.230088		+
Mbd2	18	UNC25977519	Chr 15: 81675924	2.163			0.166667		+								+	+
Mlkl	8	UNC25972890	Chr 15: 81189592	1.675			0.205128		+
Ifi204	1	UNC14504469	Chr 8: 37116053	1.494	MFHAS1	M6	0.333333	+	+
Themis2	4	UNC14505600	Chr 8: 37193355	1.494			0.306122	+						PMID: 20644716
Amica1	9	UNC14497071	Chr 8: 36774037	0.7903			0.197917	+
Znfx1	2	UNC14497071	Chr 8: 36774037	0.7903			0.275229		+
Oasl2	5	UNC14504469	Chr 8: 37116053	1.494			0.14548		+	+		+					+
Rtp4	16	UNC22371853	Chr 13: 32139020	1.935		M7	0.175824		+	+	+	+	+				+
Anxa7	14	UNC22371853	Chr 13: 32139020	1.935			0.275229	+
Dtx3l	16	UNC22371853	Chr 13: 32139020	1.935			0.27193	+			+
Myc	15	UNC22371853	Chr 13: 32139020	1.935			0.145631		+	+	+		+		+	+
Ypel3	7	UNC22373926	Chr 13: 32068303	1.92			0.18018		+
Tpm3	3	UNC22373926	Chr 13: 32068303	1.92			0.182796		+
Tnfaip3	10	UNC22371853	Chr 13: 32139020	1.935			0.224719		+	+						+	+	+
Lap3	5	UNC20834544	Chr 12: 31980123	1.32		M8	0.163043	+									+	+
Xrn2	2	UNC110896443	Chr 11: 51110929	2.136		M9	0.23913	+
Mt2	12	UNC10612972	Chr 6: 15340764	1.99		M10	0.146067	+							+	+
Table S2. Gene-SNP pairs that are associated with mice weight loss following influenza infection. For each identified genes (columns 1-2), the table reports its interacting SNP
(columns 3-4) together with the GWAS score (column 5), the relevant genes within this genomic locus (column 6), the SNP's module identifier (column 7), and its locus score (column 8). The criteria by which the genes were chosen are marked in columns 9-10. Enriched functional annotations (from the Ingenuity knowledge base: /www.qiagenbioinformatics.com/products/ingenuity-pathway-analysis/) are mar…
